1 **Phylogenetic, ecological and intraindividual variability patterns in grass phytolith shape**

2 Kristýna Hošková<sup>1,2</sup>, Jiří Neustupa<sup>1</sup>, Petr Pokorný<sup>3</sup>, Adéla Pokorná<sup>1,4</sup>

3

4 <sup>1</sup>Department of Botany, Faculty of Sciences, Charles University in Prague, Benátská 2, CZ-  
5 128 01 Praha 2, Czech Republic; <sup>2</sup>Institute of Botany, Academy of Science of the Czech  
6 Republic, CZ-252 43, Průhonice, Czech Republic; <sup>3</sup>Center for Theoretical Study, Joint  
7 Research Institute of Charles University and Czech Academy of Sciences, Husova 4, CZ-110  
8 00 Praha 1, Czech Republic; <sup>4</sup>Institute of Archaeology, Czech Academy of Sciences, Letenská  
9 4, CZ-11801 Praha 1, Czech Republic

10 Author for correspondence:

11 *Kristýna Hošková*

12 *Email: kristyna.kuncova@natur.cuni.cz*

13

14

15

16

17

18

19

20

21

22

23

24

25

26

## 27 **Summary**

- 28 • Grass silica short cell (GSSC) phytoliths appear to be the most reliable source of fossil  
29 evidence for tracking the evolutionary history and paleoecology of grasses. In recent  
30 years, modern techniques have been used to quantitatively assess phytolith shape vari-  
31 ation. This progress has widened opportunities with respect to the classification of  
32 grass fossil phytoliths. However, phylogenetic, ecological and intraindividual variabil-  
33 ity patterns in phytolith shape remain largely unexplored.
- 34
- 35 • The full range of intraindividual phytolith shape variation (3650 2D outlines) from 73  
36 extant grass species, 48 genera, 18 tribes, and 8 subfamilies (with special attention  
37 paid to Pooideae) was analysed using the geometric morphometric analysis based on  
38 the semilandmarks spanning phytolith outlines.
- 39
- 40 • Although we showed that 2D phytolith shape is mainly driven by deep-time diversifi-  
41 cation of grass subfamilies, a closer look uncovered distinct phytolith shape variation  
42 in early-diverging lineages of Pooideae.
- 43
- 44 • The phylogenetic pattern in phytolith shape was successfully revealed by applying ge-  
45 ometric morphometrics to 2D phytolith shape outlines. This finding strengthens the  
46 potential of phytoliths to track the evolutionary history and paleoecology of grasses.  
47 Moreover, geometric morphometrics of 2D phytolith shape proved to be an excellent  
48 tool for analysis requiring large sums of phytolith outlines, making it useful for quanti-  
49 tative palaeoecological reconstruction.

50  
51  
52  
53  
54  
55  
56  
57

## 58 **Key words:**

59 paleoecology, grass phylogeny, phytoliths, landmark-based geometric morphometrics,  
60 Pooideae

## 61 **Introduction**

62 As the plant silica microfossils, phytoliths have the great potential to track the evolutionary  
63 history and paleoecology of grasses (Poaceae) (Strömberg, 2005; Prasad *et al.*, 2011;  
64 Strömberg, 2011; Strömberg, 2013). Due to their composition of biogenic opaline silica  
65 ( $\text{SiO}_2 \cdot n\text{H}_2\text{O}$ ), phytoliths are preserved in various sedimentary environments, even when other  
66 grass fossils are not (Piperno, 2006; Strömberg *et al.*, 2018). Grass phytoliths, and grass silica  
67 short cell (GSSC) phytoliths, in particular, are known to vary in shape depending on multiple  
68 taxonomic levels (subfamilies, tribes, sometimes even genera; Metcalfe, 1960; Mulholland &  
69 Rapp, 1992; Piperno & Pearsall, 1998; Rudall *et al.*, 2014), whereas other grass fossil remains  
70 such as pollen, leaves, or seeds are either rare or not taxonomically informative below the  
71 family level (Jacobs *et al.*, 1999; but for the case of pollen see Mander *et al.*, 2013). The  
72 recent work of Gallaher *et al.* (2020) quantitatively documented that GSSC phytolith 3D  
73 shape carries a strong phylogenetic signal, one which can distinguish grass subfamilies and  
74 tribes. They investigated 70 species of early-diverging grasses, plus Oryzoideae and  
75 Bambusoideae. However, phylogenetic, ecological, and intraindividual variability patterns in  
76 phytolith shape in other grass taxonomic groups remain unexplored.

77 The greatest amount of grass diversity falls in either of two clades, the BOP (Bambusoideae,  
78 Oryzoideae, Pooideae) and PACMAD clade (Panicoideae, Arundinoideae, Chloridoideae,  
79 Micrairoideae, Aristidoideae, and Danthonioideae) (Strömberg, 2011; Soreng *et al.*, 2015,  
80 2017). Twiss *et al.* (1969) proposed three major divisions of GSSC phytoliths corresponding  
81 to the three dominant grass subfamilies native to the Great Plains of the United States: bi-  
82 /poly-lobate/cross in Panicoideae, saddle in Chloridoideae, and circular/oblong/rectangular in  
83 Pooideae. These divisions are mainly useful for phytolith research in regions where grasses  
84 are abundant and diverse on this (sub-familiar) taxonomic level [(for example, in grasslands  
85 of the North American Great Plains (Fredlund & Tiezsen, 1994) and Sub-Saharan Africa  
86 (Barboni *et al.*, 2007; Bremond *et al.*, 2005)]. However, they are less informative in regions  
87 where only one subfamily dominates (and has dominated throughout long-term history), as,  
88 for example, in large areas of temperate and boreal regions of Eurasia, where subfamily  
89 Pooideae prevails (Gibson, 2009).

90 Pooideae is the largest Poaceae subfamily, with almost 4000 species, most of them adapted to  
91 open and cold environments (Bouchenak-Khelladdi *et al.* 2010; Edwards & Smith, 2010;  
92 Soreng *et al.*, 2017; Schubert *et al.*, 2019a, b). While considerable effort has been made to  
93 refine the categorization of phytolith shape variation within subfamilies like Panicoideae,

94 Chloridoideae, Bambusoideae and Oryzoideae (Fahmy, 2008; Novello *et al.*, 2012; Lu & Liu  
95 2003; Neumann *et al.*, 2017; Cai & Ge 2017; Gallaher *et al.*, 2020), phytolith shape variation  
96 in Pooideae is largely unexplored, with only a handful of studies touching this area (for  
97 example in studies where *Stipa* type phytoliths are recognised, Gallego & Distel 2004;  
98 Silantyeva *et al.*, 2018; Mullholand, 1989).

99 Individual grass subfamilies are mostly adapted to certain environmental conditions and tend  
100 to prevail in specific vegetation zones (Gibson, 2009). In phytolith analysis, this association is  
101 used to define indices that can be applied as proxies of past environments. For example, the  
102 so-called aridity index (Iph; Diester-Haass *et al.* 1973; Alexandre *et al.*, 1997) presents the  
103 proportion of Chloridoideae prevailing in arid conditions (saddle-shaped morphotypes) and  
104 Panicoideae prevailing in more humid conditions (bilobates, crosses), and can be used as a  
105 proxy for aridity in past ecosystems. Similarly, the climatic index (Ic; Twiss, 1992) can be  
106 used to reconstruct past climates on the basis of the proportion of morphotypes characteristic  
107 of Pooideae adapted to open and cold environments (rondels) versus the proportion of  
108 morphotypes characteristic of Chloridoideae and Panicoideae, which are adapted to higher  
109 temperatures. However, it is untenable to use phytolith spectra *per se* for the indication of past  
110 habitat conditions without a knowledge of the distribution of phytolith variation across the  
111 phylogenetic tree, including the proportion of intraspecific variation.

112 Our recent study (Hošková *et al.*, 2021) observed very low GSSC phytolith shape plasticity  
113 between populations of the same species, compared to interspecific variation, according to a  
114 hierarchically designed study of two grass species with restricted ecological niches  
115 (*Brachypodium pinnatum*, *B. sylvaticum*). Thus, we considered phytolith shape variation due  
116 to environmental conditions to be negligible. However, significantly high residual variation  
117 (51% of the total variation, which was not captured by the defined levels: species,  
118 populations, individuals, leaves and parts of leaves) was related to the intraindividual  
119 variation of phytolith shape within the individual sample. This type of variation (which is  
120 intrinsic to phytoliths and demarcates it from variation in other fossils) causes species to carry  
121 more than one phytolith morphotype, resulting in an overlap of phytolith shapes between taxa  
122 (e. g. Rovner & Russ, 1992). Piperno & Pearsall (1998), in their seminal work, proposed that  
123 intraindividual variation in phytolith shape may be lineage-specific; thus, species could vary  
124 in the amount of intraindividual phytolith shape variation on the basis of their position in the  
125 phylogenetic tree. Thus, knowledge of the full range of intraindividual variation could  
126 complete our image of the phylogenetic pattern in phytolith shape.

127 In order to quantify the proportion of intraindividual variation in relation to the phylogenetic  
128 pattern in phytolith shape, we used methods of geometric morphometrics (Hošková *et al.*,  
129 2021). We explored whether GSSC phytolith shapes changed in response to diversification  
130 during grass evolution and how closely phytolith shapes reflect phylogenetic relationships in  
131 the Poaceae family. As the degree of intraindividual variation in phytolith shape in most  
132 grasses has never been explored, we aimed to separate the intraindividual variation from the  
133 variation due to phylogeny. We paid particular attention to the understudied grass subfamily  
134 Pooideae, adapted to open and cold conditions, focusing, on the potential affinity of  
135 ecological adaptation of species to phytolith shape variation within this group.

136 Geometric morphometrics is undoubtedly one of the most frequently applied techniques of the  
137 biological shape analysis today (Polly & Motz, 2016). It enables size to be effectively  
138 removed and thus focuses purely on the analysis of shape, allowing the simple collection of  
139 coordinate data and easy visualisation of results as transformations of shapes themselves  
140 rather than as tables of numbers (Bookstein, 1989; Klingenberg, 2013). Hence, unlike the  
141 traditional description of predefined phytolith morphotypes {(International Code for Phytolith  
142 Nomenclature 2.0 [International Committee for Phytolith Taxonomy (ICPT), 2019]},  
143 geometric morphometrics allows the quantification and visualisation of a continuous phytolith  
144 shape variation. Therefore, different phytolith morphotypes are analysed together within a  
145 single multivariate space (morphospace), and, as a result, the major trends in shape variation  
146 are explored. The Procrustes superimposition method, which is the core of the geometric  
147 morphometric analysis, relies on the point-to-point correspondence of individual landmarks  
148 among the analysed specimens. In case of phytolith outlines, these points are represented by  
149 series of equidistant semilandmarks. In those phytoliths having symmetric 2D shapes, there  
150 may be two or more fixed points delimiting individual symmetric curves. These points are  
151 typically derived from the orientation of phytoliths within plant tissue (Hošková *et al.*, 2021).

## 152 **Materials and Methods**

### 153 *Plant material processing*

154 3650 modern grass phytoliths from 73 species, 48 genera, 18 tribes, 8 subfamilies were  
155 analysed (Table S1).

156 Plant material was processed following the *in situ* charring method of Kumar *et al.* (2017).  
157 This method preserves the original phytolith position within the plant epidermis. One leave  
158 per plant per species was sampled. Leaves were cleaned in an ultrasonic cleaner (Digital

159 Ultrasonic Cleaner CE-7200A). The segment of leave was laid on a glass slide. Small pieces  
160 of folded aluminium foil were placed near the two shorter sides of the slide. Another glass  
161 slide was placed on top of the slide, holding the sample in place. The slides were put into a  
162 muffle furnace at 550 °C for 5 h. The aluminium foil between the slides prevented the slides  
163 from sticking together. The slides containing burnt material were washed with 1 N HCl and  
164 distilled water (using a pipette). After the slides dried, plant material placed on the bottom  
165 slide was covered with one drop of a 15 % solution of glycerol and the cover slide. The slides  
166 were then analysed using transmission light microscopy (Leica DM 1000 LED).

### 167 *Data acquisition*

168 Sequential microphotographs of rows of GSSC phytoliths in the charred epidermis were  
169 acquired under  $\times 400$  magnification (Leica camera ICC50 W). The planar view of GSSC  
170 costal (over veins) phytolith morphotypes with a long axis parallel with the long axis of the  
171 leaf was chosen for the analysis. First, two fixed landmarks were placed at the phytolith edges  
172 perpendicular to the longest axis of the leaf (Fig. 1; Methods S1). Then, 48 equidistant points  
173 were placed along both outline halves, resulting in 96 points which were treated as  
174 semilandmarks in the subsequent geometric morphometric analysis. For each individual  
175 phytolith image (3650 in total), 98 two-dimensional points were digitised. This approach was  
176 only applied to phytolith morphotypes observed from the planar view called bilobates,  
177 polylobates, saddles, crenates and trapezoids {(International Code for Phytolith Nomenclature  
178 2.0 [International Committee for Phytolith Taxonomy (ICPT), 2019]}, whereas rondels,  
179 positioned from the planar view in leaf epidermis, had no identifiable landmarks and were not  
180 analysed. During the plant material processing, segments of leaves were laid on a glass slide  
181 with random orientation regarding abaxial–adaxial leaf sides; however, the outer periclinal  
182 surface of phytoliths was chosen for phytolith outline analysis since under light microscopy it  
183 has clear, distinct edges that are well defined. Digitisation was carried out using the semi-  
184 automated background curves tool in TpsDig, ver. 2.31 (Rohlf, 2015). Equidistant positions of  
185 semilandmarks along the outlines relative to the positions of the fixed landmarks were  
186 obtained using the ‘*digit.curves*’ function in GEOMORPH, v. 3.3.2 (Dryen & Mardia, 2016;  
187 Adams *et al.*, 2021), in R, v. 3.6.3 (R Core Team, 2020) (for summarized methodological  
188 workflow see Supplemental files Methods S2).

189

190



191

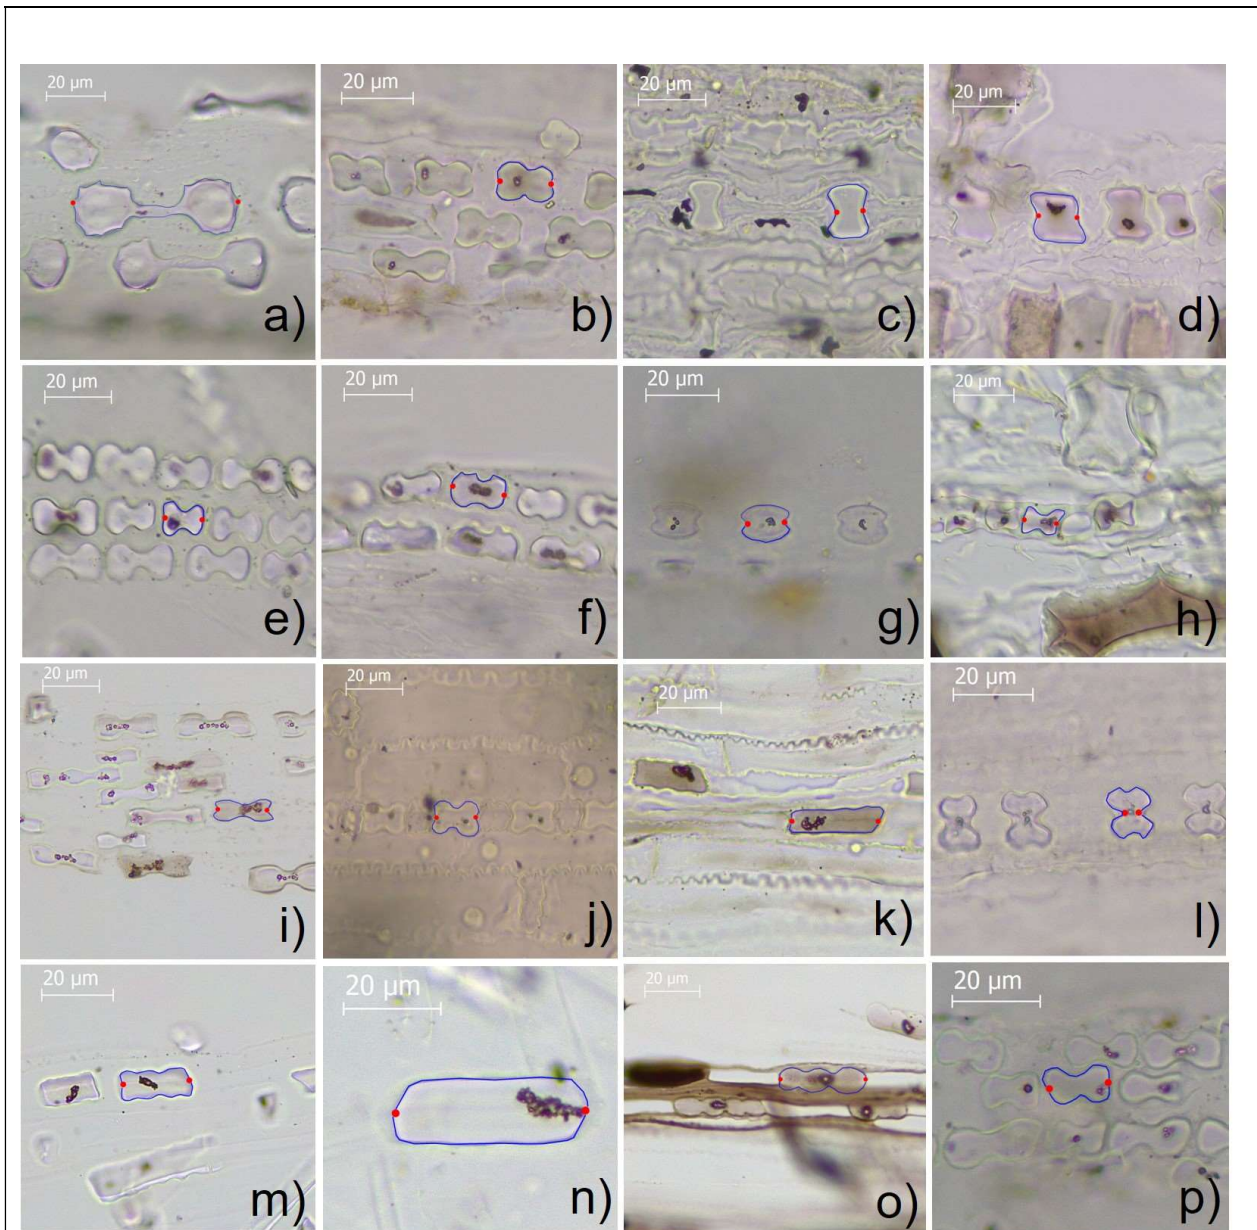

Fig. 1 Microphotographs of charred grass epidermises with GSSC phytoliths. Red dots indicate two fixed landmarks; blue lines indicate phytolith outline with 96 equidistant semilandmarks. (a) *Aristida rhiniochloa*, Aristidoideae; (b) *Hakonechloa macra*, Arundinoideae; (c) *Bambusa tuldoidea*, Bambusoideae; (d) *Arundinaria gigantea*, Bambusoideae; (e) *Danthonia alpina*, Danthonioideae; (f) *Schismus arabicus*, Danthonioideae; (g) *Cynodon dactylon*; (h) *Brachyelytrum erectum*, Pooideae; (i) *Bothriochloa ischaemum*, Panicoideae; (j) *Coix lacrymajobi*, Panicoideae; (k) *Alopecurus pratensis*, Pooideae; (l) *Zizania latifolia*, Oryzoideae; (m) *Bromus erectus*, Pooideae; (n) *Holcus lanatus*, Pooideae; (o) *Melica picta*, Pooideae; (p) *Stipa sibirica*, Pooideae.

192

193

194 *Data analysis*

195 Generalised Procrustes Analysis of phytoliths with biradial symmetry

196 Geometric morphometrics was performed on a data set of 3650 phytolith configurations, each  
197 consisting of 98 landmark coordinates (following Hošková *et al.*, 2021). The 2D shape of  
198 phytoliths from planar view (long axis of phytolith parallel with the long axis of the leaf) is  
199 typical by its biradial symmetry, meaning that left-right and upper-bottom parts of the 2D  
200 outline are not differentiated. Thus, to achieve correspondence of all phytolith configurations  
201 under study, we applied geometric morphometrics for the analyses of biradial symmetry  
202 (Savriama *et al.*, 2010; Savriama & Klingenberg, 2011; Savriama *et al.* 2012; Neustupa,  
203 2013) (Methods S1). A Generalised Procrustes Analysis, which minimises the sum of squared  
204 distances between corresponding landmarks to extract shape data by removing the extraneous  
205 information of size, location and orientation, was applied (e. g. Zelditch *et al.*, 2012; Dryden  
206 & Mardia, 2016). The semilandmark position was optimised by their iterative sliding along  
207 the curve tangents to achieve the lowest bending energy yielding the smoothest possible  
208 deformation between each configuration and the mean shape (Bookstein, 1997; Pérez *et al.*,  
209 2006; Gunz & Mitteroecker, 2013). Original phytolith configurations were transformed and  
210 re-labelled and then subjected to a Generalised Procrustes Analysis. The resulting multiplied  
211 dataset consisted of Procrustes coordinates of original configurations and transformed and re-  
212 labelled copies (a reflected copy about the horizontal adaxial–abaxial axis; a reflected copy  
213 about the vertical left-right axis; a copy reflected about both axes) (Savriama & Klingenberg,  
214 2011; Klingenberg, 2015; Savriama, 2018; Hošková *et al.* 2021). By averaging the original  
215 configuration and transformed copies of each specimen, symmetrised phytolith configurations  
216 were obtained. These are symmetric and thus invariant under all transformations. A  
217 Generalised Procrustes Analysis was conducted using the ‘*procGPA*’ function in *SHAPES*, v.  
218 1.2.5 in R, v. 3.6.3.

219 Quantification of symmetric and asymmetric components of shape variation

220 Principal component analysis (PCA) was conducted with the superimposed Procrustes  
221 coordinates consisting of all the original configurations and their transformed copies. This  
222 PCA separated components of symmetric shape variation (variation between symmetrised  
223 configurations) from three components of asymmetry (asymmetry under reflection in the  
224 adaxial–abaxial direction, asymmetry in the left-right direction and asymmetry regarding both  
225 these axes) (Savriama *et al.*, 2010; Klingenberg, 2015). The proportion of variation in the sub-



226 spaces of biradial symmetry and three asymmetric patterns were quantified by summing up  
227 the percentages of variance explained by PCs belonging to a given subspace using scores  
228 from PCs obtained by *'procGPA'* function in *SHAPES*, v. 1.2.5 in R, v. 3.6.3.

### 229 Quantification of different sources of shape variation

230 Different sources of the shape variation among phytoliths were quantified by multivariate  
231 Procrustes analysis of variance (ANOVA) of the symmetrised configurations of individual  
232 phytoliths (e. g. Klingenberg, 2015). Data were analysed in a nested structure that was  
233 reflected by the Procrustes ANOVA models. The analysis decomposed the matrix of  
234 Procrustes distances among individual configurations into different sources specified by the  
235 independent factors. Besides quantifying the Procrustes sum of squares (SS) spanned by each  
236 factor and their proportion on the total variation ( $\eta^2$ ), the significance of the effects were  
237 evaluated by comparing their original Procrustes SS values with their random distribution  
238 yielded by 999 permutations (Schaefer *et al.*, 2006; Neustupa & Woodard, 2021). The  
239 randomisation design reflected the nested structure of the independent factors. The main  
240 effect evaluating the differentiation between the phytoliths of the BOP and PACMAD  
241 lineages was tested against the random distribution based on the repeated reshuffling of  
242 individual subfamilies between BOP and PACMAD. Likewise, the SS spanned by the  
243 'subfamily' effect nested within 'BOP vs. PACMAD' were evaluated by comparison with the  
244 random distribution yielded by reshuffling of tribes among subfamilies within the BOP and  
245 PACMAD groups. Then, the effect of tribes was tested against the random SS distribution  
246 based on the reshuffling of genera among different tribes, and the effect of genus identity on  
247 phytolith shapes was tested against the random SS distribution based on a reshuffling of  
248 species among genera. Finally, the differentiation of phytoliths among the species was  
249 evaluated by randomisation of individual specimens. The function *'procD.lm'* in *GEOMORPH*, v.  
250 3.3.2 (Dryen & Mardia, 2016; Adams et al., 2021), in R, v. 3.6.3 (R Core Team, 2020) was  
251 used for the decomposition of sources of phytolith shape variation. Pairwise randomised  
252 residual permutation procedure *posthoc* tests were performed using *'pairwise'* function in *RRPP*  
253 v. 0.5.2 in R, v. 3.6.3.

254 To visualise the discrimination of grass subfamilies by their phytolith shape, canonical  
255 variates analysis (CVA) was performed on symmetrised phytolith shape configurations in  
256 MorphoJ (Klingenberg, 2011).

257

258 Amount of intraindividual variation in phytolith shape in individual grass species

259 The amount of intraindividual variation in phytolith shape in individual grass species,  
260 represented by average Procrustes distances of individual phytoliths to species centroids, was  
261 compared using the function ‘*betadisper*’ of in VEGAN (Oksanen *et al.* 2019) in R v. 3.6.3.

262 Phytolith shape and grass phylogeny

263 Grass phylogeny was generated (using S3 scenario) with function ‘*phylo.maker*’ in  
264 V.PHYLOMAKER, v.0.1.0 in R, v. 3.6.3 (Jin & Qian 2019) using ‘backbone’ tree based on  
265 molecular data from seed plant phylogeny (mega-tree ‘GBOTB.extended.tre’; Smith &  
266 Brown, 2018). Out of the 73 species examined, 54 species were in the Smith & Brown (2018)  
267 backbone tree with the rest added using the S3 scenario of Jin & Qian (2019).

268 To visualise the phylogenetic history of phytolith shape change, grass species positions along  
269 PC1 were mapped on the grass phylogeny tree. Likewise, PCs spanning different components  
270 of asymmetric variation were mapped on this tree. Intraindividual shape variation, represented  
271 by averaged distances from species group centroid in multivariate space, was also mapped on  
272 the grass phylogeny. We used function ‘*phylosig*’ in R/PHYTOOLS v. 0.7.47 (Revell, 2012) to  
273 determine Pagel's lambda as a measure of phylogenetic signal in individual components of the  
274 shape data (individual PCA axes, amount of intraindividual variation). We used function  
275 ‘*pgls*’ in R/CAPER, v. 1.0.1 to calculate confidence intervals (Orme *et al.*, 2018). We used  
276 function ‘*contMap*’ to visualise the phylogenetic history of individual components of the  
277 shape data, using the function ‘*fastAnc*’ in R/PHYTOOLS v. 0.7.47 to reconstruct maximum  
278 likelihood values at tree nodes (Revell, 2012).

279 The phylogenetic tree of the studied taxa was projected onto the shape tangent space by  
280 squared-change parsimony in MorphoJ (Klingenberg, 2011). The resulting tree was plotted in  
281 the plane of the PC1 vs PC2 ordination plot of the species-level averaged shapes.

282

283

284

285

286

287 **Results**

288 *Decomposition of symmetric and asymmetric variation in phytolith shape*

289 The first group of PCs, associated with entirely symmetric shape variation, accounted for  
290 89.5 % of the total variation of the data set. The second group of PCs, associated with three  
291 subspaces of asymmetric shape variation, accounted for 11.0 % of the total variation. Thus,  
292 the PCA results indicated that phytolith shape variation consisted mainly of symmetric  
293 variation between individual phytoliths and relatively little asymmetric shape variation within  
294 phytoliths (e. g. between their left and right sides). Therefore, in the following analyses of  
295 phytolith shape, we considered only the data set of the symmetrised phytolith configurations.

296 *Sources of variation in phytolith shape*

297 Individual taxonomic levels accounted for 81.9 % of the total variation in symmetric phytolith  
298 shapes (Fig. 2, Table 1). Residual variation consisting of phytolith shape variation within  
299 individuals was considerably lower (18.2 %). Variation between subfamilies was the most  
300 pronounced (42.7 %,  $P = 0.001$ ), followed by variation between tribes (14.0 %,  $P=0.001$ ),  
301 species (13.3 %,  $P=0.001$ ), and genera (10.4 %,  $P=0.9$ ). The phytolith shape variation  
302 between PACMAD and BOP clades accounted for only 1.4 % of the total variation ( $P=0.7$ ).

303 Significant differences in phytolith shape were found for all the 28 subfamily pairs in the  
304 *posthoc* pairwise tests (at the significance level of 0.01) (Fig. 3; Table S2).

305

306

307

308

309

310

311

312

313

314

315

316

317 **Table 1** Results of Procrustes ANOVA evaluating different sources of variation in  
318 symmetrised phytolith shape. df: degrees of freedom; SS: sum of squares; MS: means  
319 squares;  $\eta^2$ : proportion on the total variation; P: probability of the null hypothesis. \*\*\*, P <  
320 0.001

| <b>Source</b>             | <b>df</b> | <b>SS</b> | <b>MS</b> | <b><math>\eta^2</math></b> | <b>P</b> |
|---------------------------|-----------|-----------|-----------|----------------------------|----------|
| BOPxPACMAD                | 1         | 0.742     | 0.742     | 0.014                      | 0.7      |
| Subfamily<br>(BOPxPACMAD) | 6         | 22.861    | 3.81      | 0.427                      | 0.001*** |
| Tribe (subfamily)         | 10        | 7.465     | 0.747     | 0.14                       | 0.001*** |
| Genus (tribe)             | 30        | 5.589     | 0.186     | 0.204                      | 0.9      |
| Species (genus)           | 26        | 7.135     | 0.274     | 0.133                      | 0.001*** |
| Residuals                 | 3576      | 9.713     | 0.003     | 0.182                      |          |
| Total                     | 3649      | 53.506    |           |                            |          |

321

322

323

324

325

326

327

328

329

330

331

332

333

334

335

336

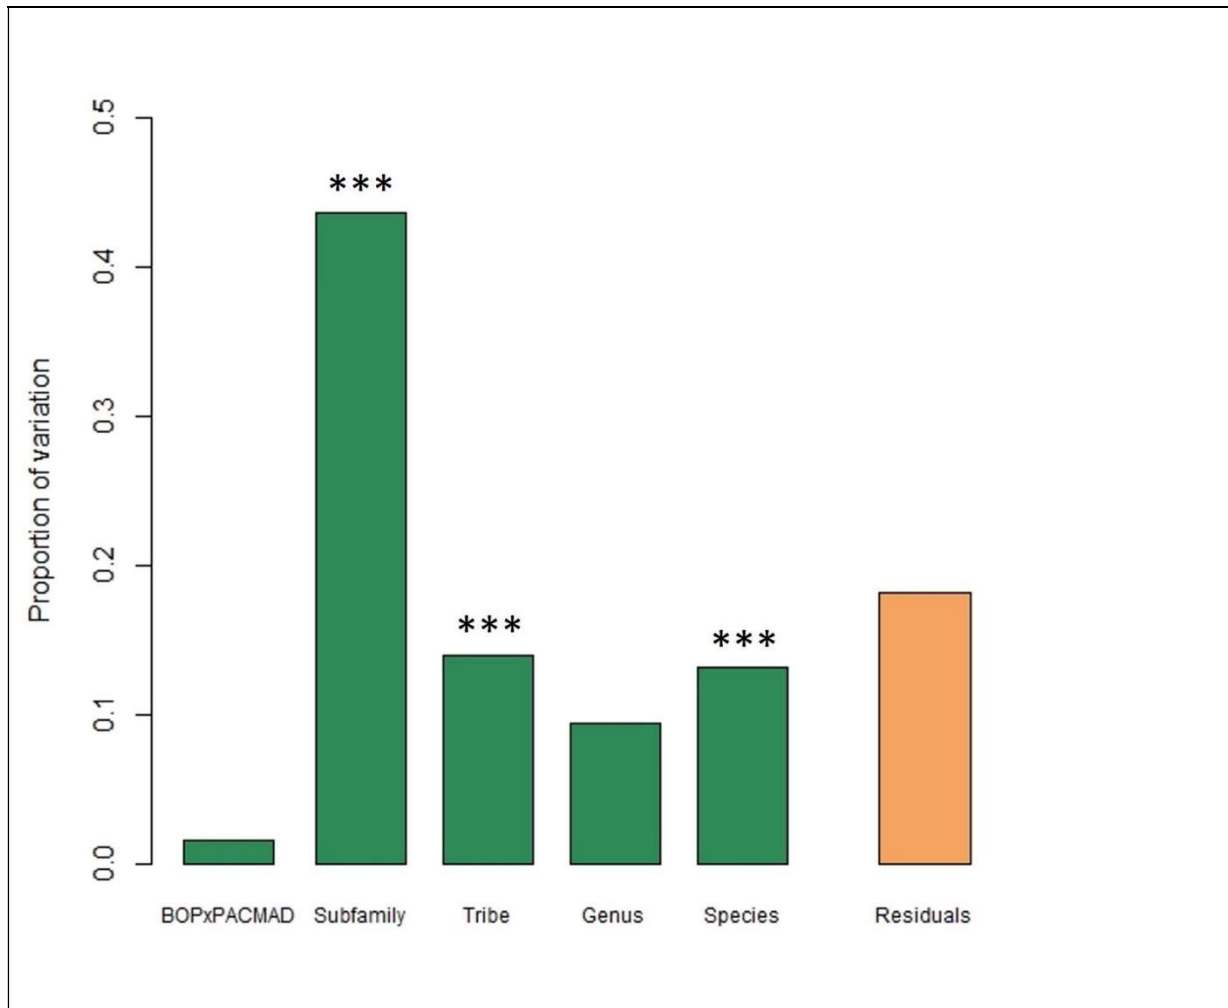

Fig. 2 Coloured bars represent the proportion of variation in phytolith shape attributed to the various taxonomic levels and residual intraindividual variation. Stars indicate statistically significant differences in phytolith shape between the subfamilies, the tribes and the species. \*\*\*,  $P < 0.001$

337

338

339

340

341

342

343



344

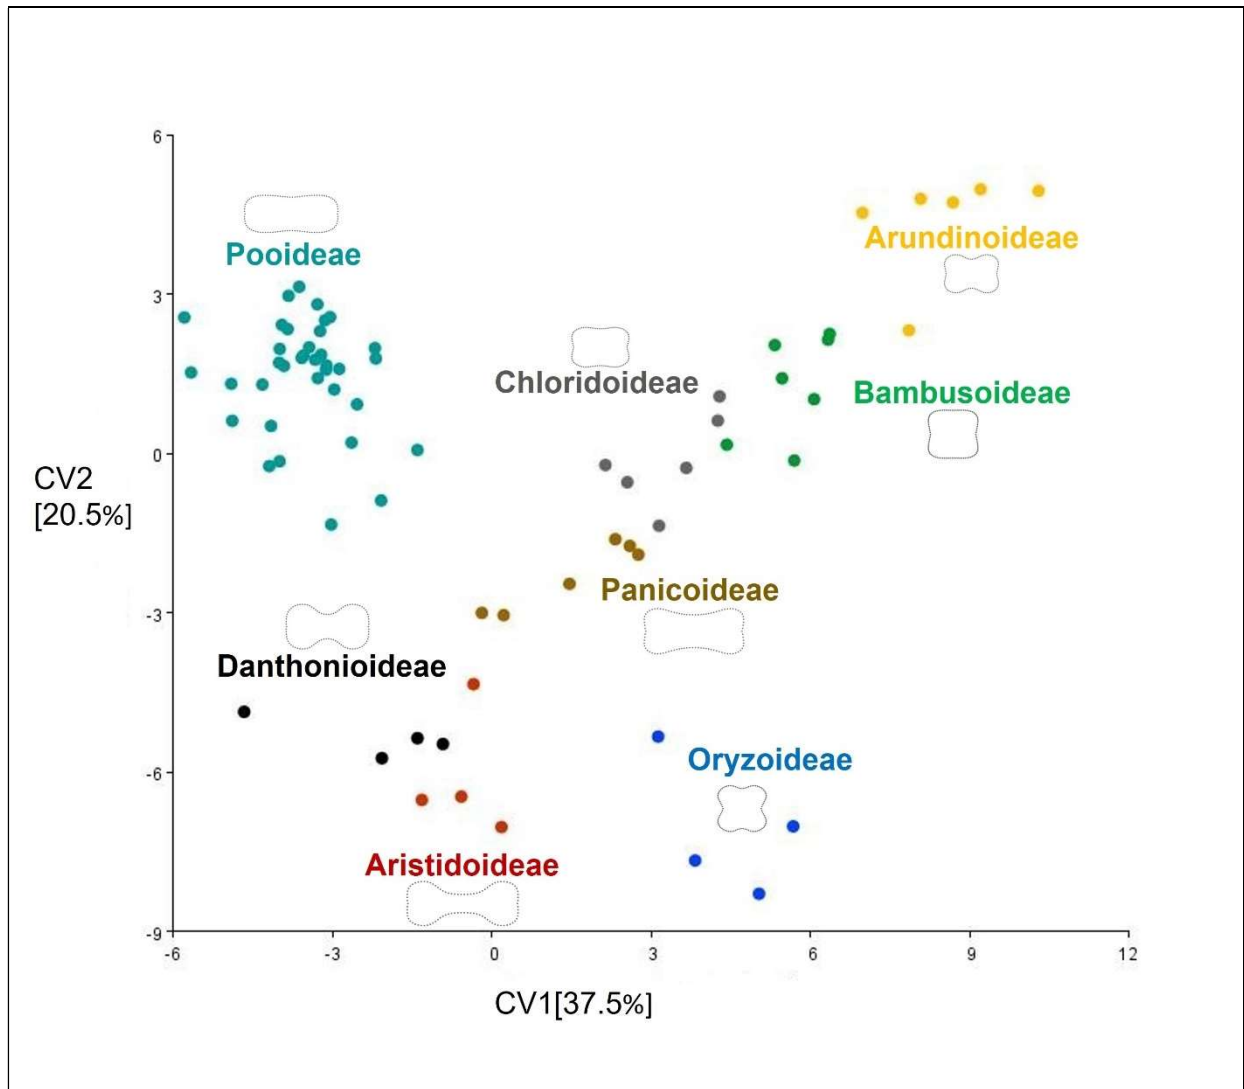

Fig. 3 Canonical variates analysis used to discriminate between grass subfamilies by symmetrised grass silica short cell phytoliths shape. Dots represent averaged phytolith shape of individual grass species. Colours of dots indicate grass subfamilies. Phylogenetic signal in phytolith shape is apparent from the distinctive position of individual grass subfamilies in the morphospace.

345

346

347

348

349

350

351 *Intraindividual phytolith shape variation across species*

352 The amount of intraindividual GSSC phytolith shape variation differed across species (Fig. 4;  
353 Notes S1). The phytolith shape of some species varied to such an extent that two different  
354 morphotypes, as traditionally defined, occurred – we reported variation from bilobate- to  
355 saddle-shaped phytoliths in *Eragrostis minor*, and variation from bilobate- to polylobate-  
356 shaped phytoliths in *Brachypodium dystachion*, *B. pinnatum*, *Bromus inermis*, *Calamagrostis*  
357 *epigejos*, *Bothriochloa ischaemum*, *Coix lacryma-jobi*, and *Digitaria sanguinalis*. Other  
358 species, like *Bromus erectus* (tribe Bromeae), *Melica picta* (tribe Meliceae), *Festuca*  
359 *gigantea*, *Festuca arundinacea*, *Helictotrichon pubescens*, *Milium effusum*, *Phleum pratense*,  
360 *Poa nemoralis*, and *Trisetum flavescens* (tribe Poeae) significantly varied intraindividually in  
361 the length and width of GSSC phytoliths (the so-called crenate morphotype). *Ehrharta erecta*  
362 (tribe Ehrharteae) varied intraindividually in the length of the polylobate phytolith shape,  
363 whereas *Brachyelytrum erectum* (tribe Brachyelytreae), *Dichanthium annulatum* (tribe  
364 Andropogoneae), and *Echinochloa crus-galli* (tribe Paniceae) varied intraindividually in the  
365 length of the bilobate shape.). In contrast, some species were very conservative in their  
366 phytolith shape, like, for example, *Bambusa tuldoides*, *Phragmites australis*, and *Aristida*  
367 *rhinochloa*.

368

369

370

371

372

373

374

375

376

377

378

379

380

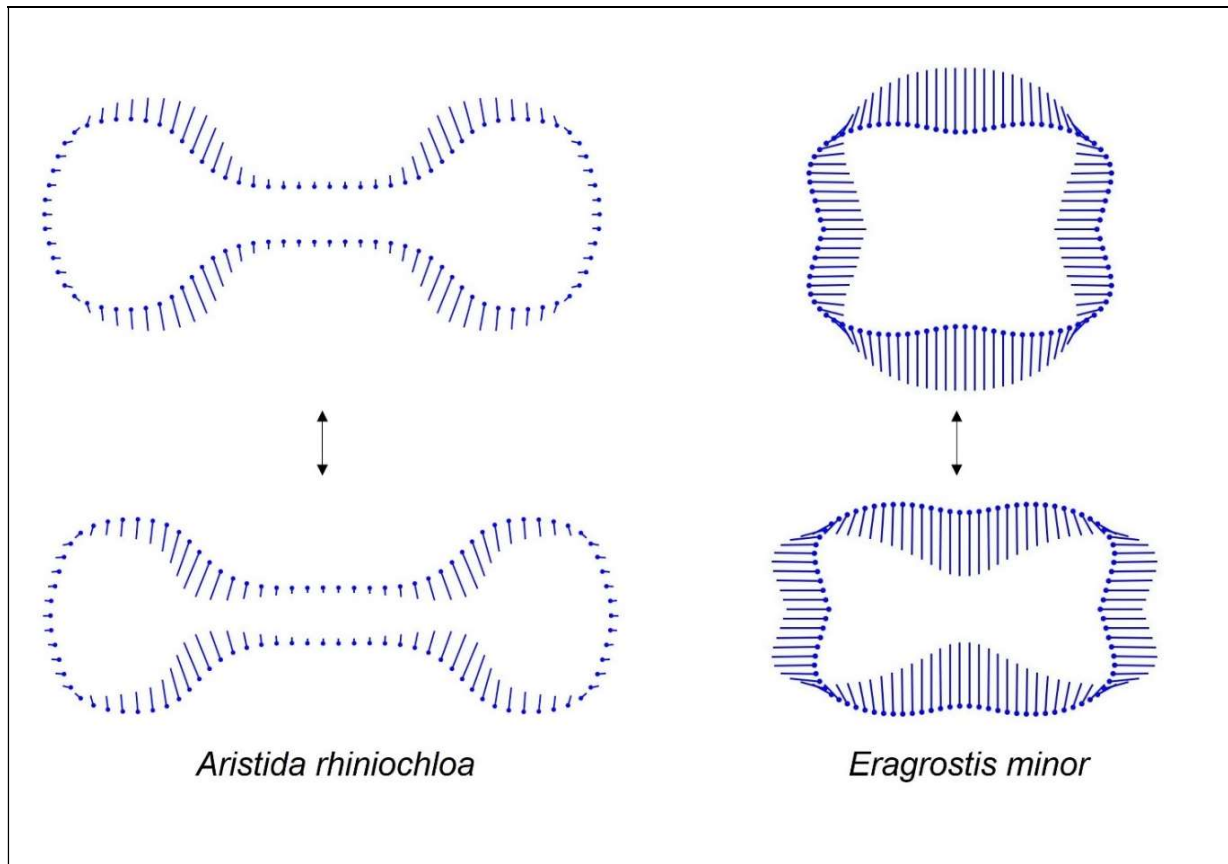

Fig. 4 The amount of intraindividual variation in phytolith shape (represented by the average distance of individual phytolith to species centroid) is visualised by 'lollipop' graphs where the stick of the lollipop indicates the direction of the variation, whereas the lollipops (filled dots) represent together mean phytolith shape outline. *Aristida rhinochloa* represent species with less variable phytolith shape, whereas *Eragrostis minor* has highly variable phytolith shape. (For the phytolith outlines of more species see Supplemental files Notes S1)

381

382

383

384

385

386

387

388

389 *Mapping phytolith shape data onto the phylogeny*

390 According to the PCA performed on the symmetrised phytolith configurations, the first two  
391 PCs explained >96 % of the total variation (Fig. 5). Along PC1 (explaining 89.5 % of the total  
392 variation), phytoliths varied between elongated shapes with two deeply incised lobes and  
393 shorter and taller shapes on opposite sides. Along PC2 (explaining 7.0 % of the total  
394 variation), phytolith shape varied between shorter outlines with two deeply incised lobes and  
395 elongated shapes with a pronounced middle part on the opposite sides.

396

397

398

399

400

401

402

403

404

405

406

407

408

409

410

411

412

413

414

415

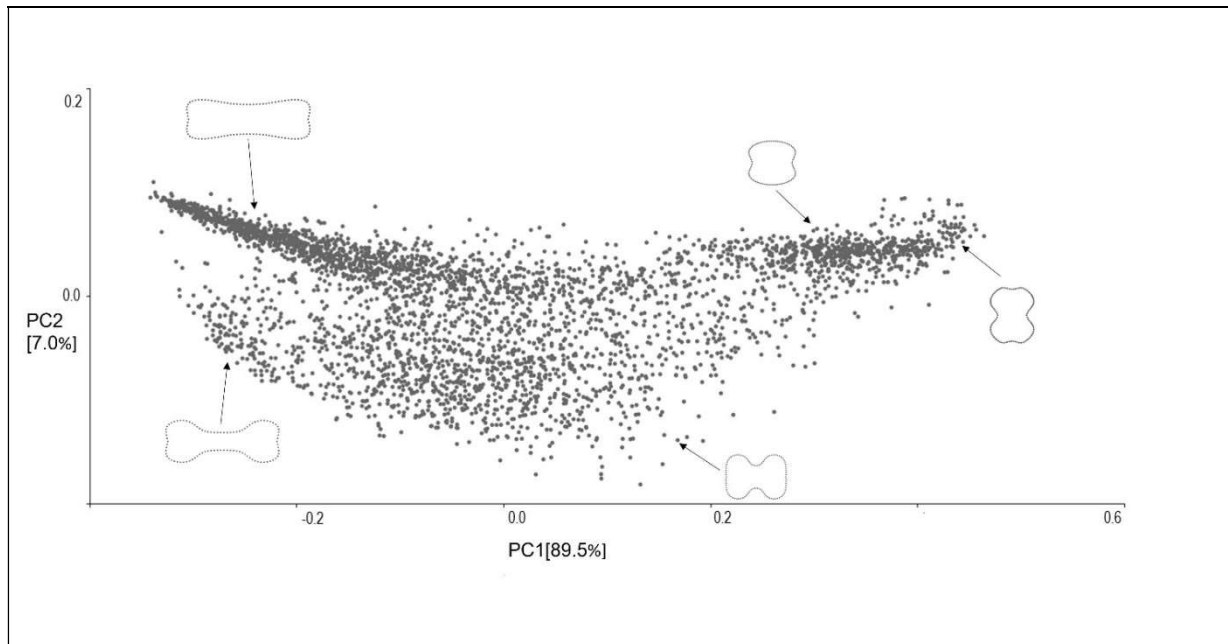

Fig. 5 Principal component analysis of 3650 symmetrised grass silica short cell phytolith shape configurations. Dots indicate individual phytoliths. The first two PCs are associated with the most pronounced shape variation within the dataset. Phytolith outlines represent shape variation along both axes.

416

417

418

419

420

421

422

423

424

425

426

427

428



429 To visualise the phylogenetic history of symmetric phytolith shape change, we mapped grass  
430 species positions along PC1 on the grass phylogeny tree (Fig. 6). The most prominent shape  
431 variation in the data — an elongated shape with two deeply incised lobes vs shorter and taller  
432 shapes — was strongly phylogenetically conserved at the subfamily level. Thus, individual  
433 monophyletic subfamilies substantially differed in their phytolith shapes. On the other hand,  
434 similar phytolith shapes occurred in two major grass subclades: BOP and PACMAD. The  
435 measure of phylogenetic conservatism for individual PCs describing symmetrised shape  
436 variation, along with the measure of phylogenetic conservatism in asymmetric components of  
437 shape variation and in the amount of intraindividual variation (Fig. S1), are summarised in  
438 Table 2.

439

440

441

442

443

444

445

446

447

448

449

450

451

452

453

454

455

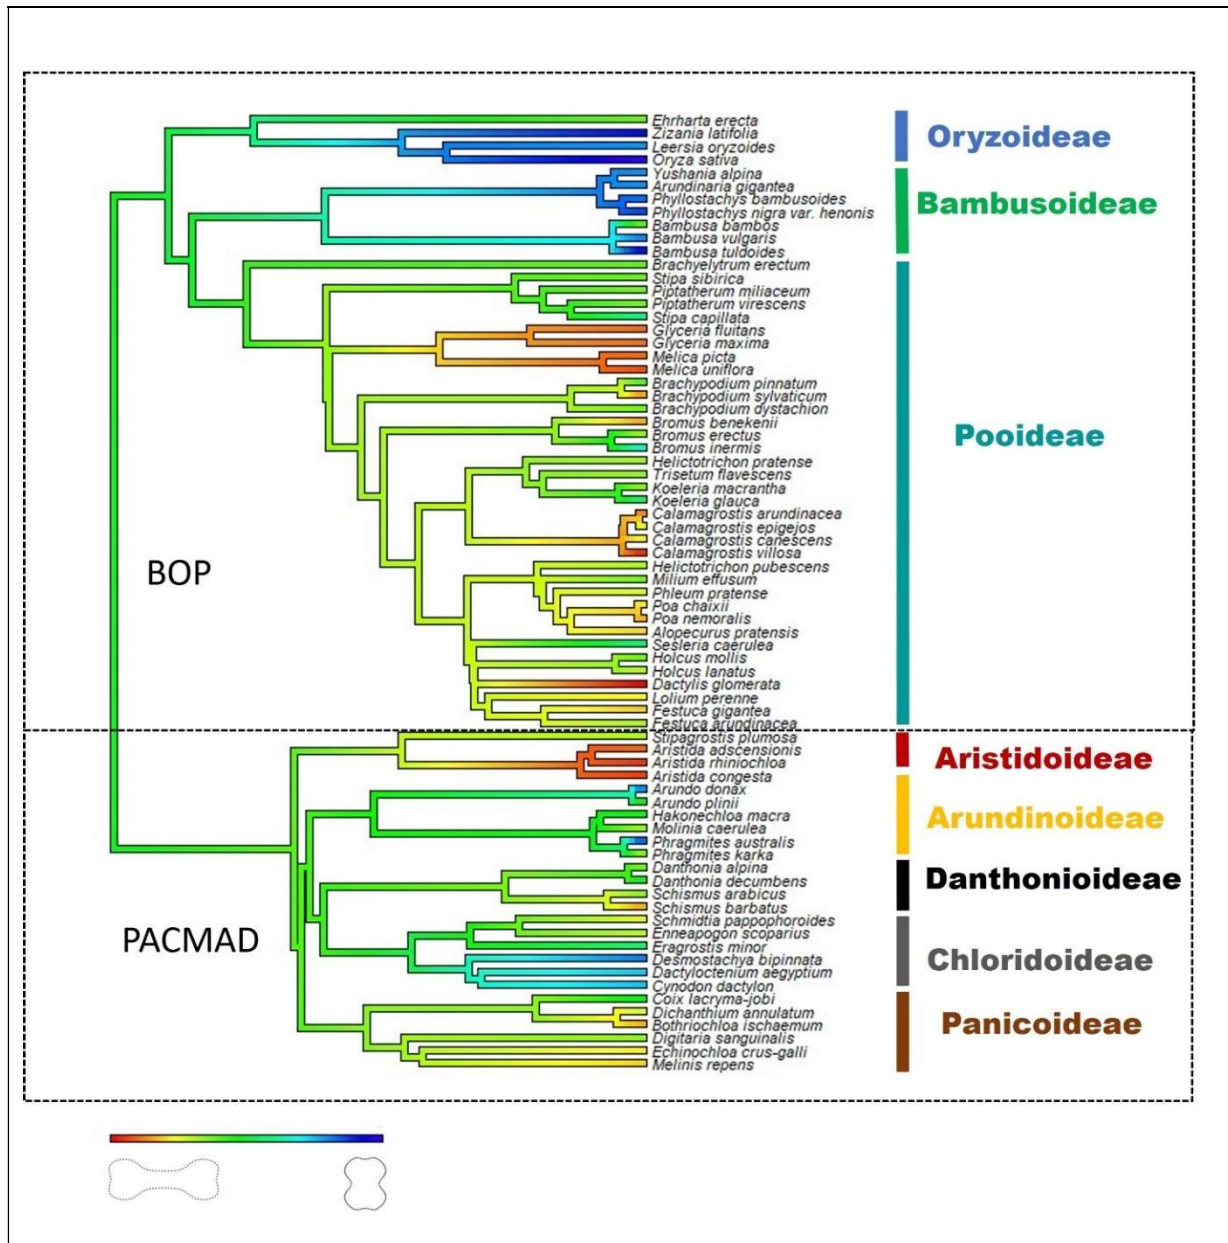

Fig. 6 Phytolith shape variation pattern across grass phylogeny. Grass phylogeny was constructed with V.PhyloMaker package in R (Jin & Qian, 2019), 'backbone' tree based on molecular data from seed plant phylogeny (mega-tree 'GBOTB.extended.tr'; Smith & Brown, 2018). Grass species positions along the first principal component axis (PC1) were mapped on the tree. Colour scale indicates grass silica short cell phytolith shape variation along PC1.

456

457

458

459

460

461 **Table 2** Measure of phylogenetic conservatism in averaged phytolith shape represented  
 462 by principal components of symmetric (PC1-PC4) and asymmetric shape variation (vertical,  
 463 left-right, transversal). Phylogenetic conservatism of the amount of intraindividual variation  
 464 in symmetrised phytolith shape was also measured (see also Fig. S1). The amount of  
 465 intraindividual variation in phytolith shape in individual grass species is represented by  
 466 average distance of individual phytolith to species centroid. N=73

| Type of shape variation          | Proportion of variation (PCA) | (%)  | Pagel's lambda ( $\lambda$ ) | Lower 95% CI | Upper 95% CI |
|----------------------------------|-------------------------------|------|------------------------------|--------------|--------------|
| <i>Symmetric</i>                 | PC1                           | 89.5 | 0.686                        | 0.453        | 0.843        |
|                                  | PC2                           | 7.0  | 0.517                        | 0.208        | 0.753        |
|                                  | PC3                           | 1.5  | 0.523                        | 0.236        | 0.75         |
|                                  | PC4                           | 1.0  | 0.486                        | 0.083        | 0.764        |
| <i>Intraindividual Symmetric</i> | -                             | -    | 0.428                        | 0.053        | 0.744        |
| <i>Asymmetric</i>                | Vertical                      | 1.9  | 0.188                        | NA           | 0.627        |
|                                  | Left-right                    | 2.4  | $6.10^{-5}$                  | NA           | 0.219        |
|                                  | Transversal                   | 6.7  | $6.10^{-5}$                  | NA           | 0.455        |

467

468

469

470

471

472

473

474

475

476

477

478

479

480

481 The phylogenetic tree of the subfamily Pooideae was also projected onto the shape tangent  
482 space by squared-change parsimony. The resulting tree was plotted in the plane of the PC1 vs  
483 PC2 ordination plot of the species-level mean shapes (Fig. 7). The phylogenetically closely-  
484 related taxa were not necessarily close to each other in the morphospace, so there are long  
485 branches that criss-cross the plot. On the other hand, a number of other closely-related taxa,  
486 especially *Stipa capillata*, *S. sibirica*, *Piptatherum miliaceum*, *P. virescens* in the tribe Stipeae  
487 and *Melica picta*, *M. uniflora*, *Glyceria fluitans*, *G. maxima* in the tribe Meliceae showed  
488 close correspondence between phylogeny and phytolith shape variation described by the first  
489 two PCs.

490

491

492

493

494

495

496

497

498

499

500

501

502

503

504

505

506

507

508

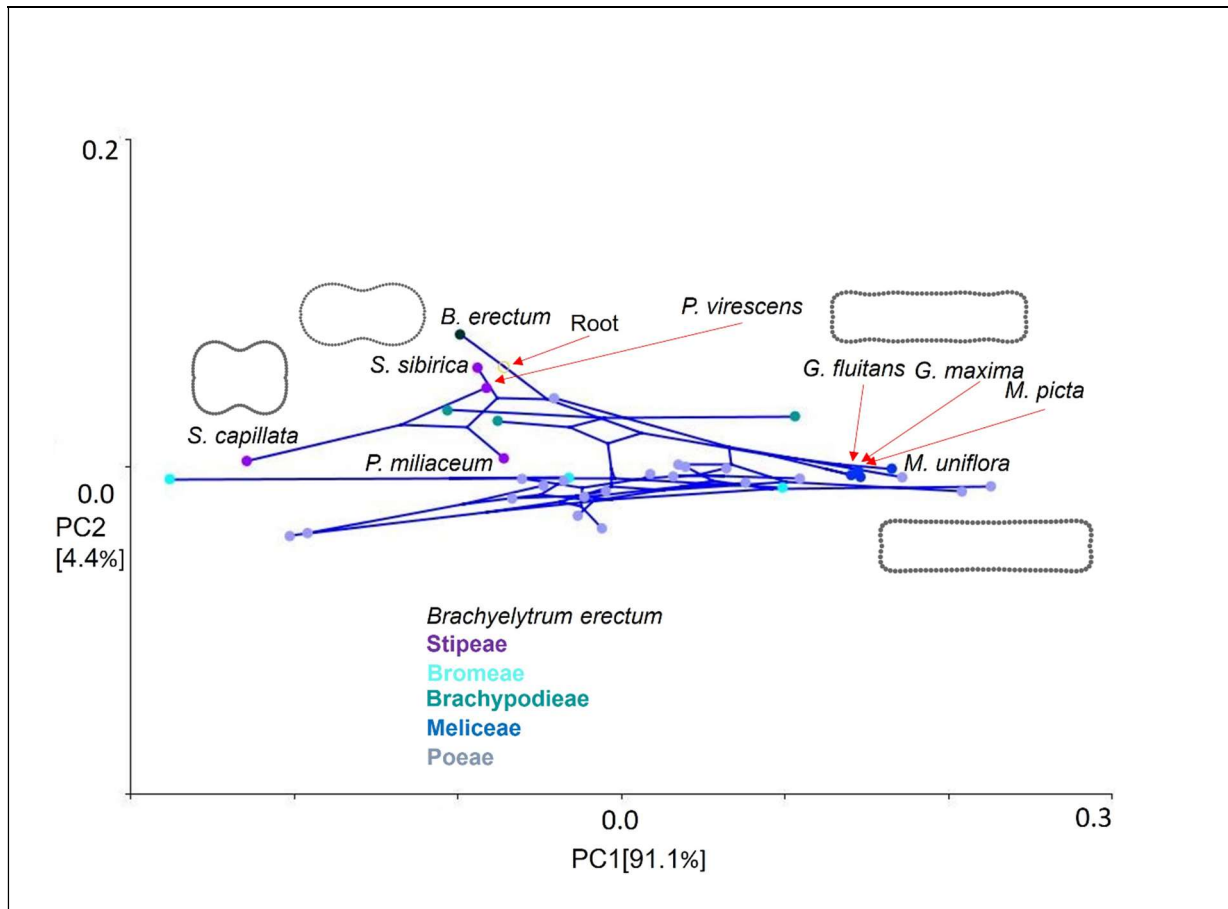

Fig. 7 Grass phylogeny mapped onto morphospace represented by the PC1 vs PC2 of the subfamily Pooideae. Coloured dots indicate analysed species from the various tribes; lines represent phylogenetic tree diversification. Closely related species (*Stipa capillata*, *Stipa sibirica*, *Piptatherum miliaceum*, *Piptatherum virescens*, *Melica picta*, *Melica uniflora*, *Glyceria fluitans*, *Glyceria maxima*) with phytolith shape variation well correlated with relationships in phylogenetic trees and their phytolith shape outlines are indicated.

509

510

511

512

513

514

515

516



## 517 **Discussion**

### 518 *The observed evolutionary pattern in phytolith shape*

519 In general, the results of this study concur with previous reports that GSSC phytolith shapes  
520 closely reflect phylogenetic relationships between taxa (Piperno & Pearsall, 1998; Gallaher *et*  
521 *al.*, 2020). Thus, in the case of Poaceae, this means that phytolith shape changed along with  
522 other anatomical and micromorphological leaf traits in response to their diversification in the  
523 course of evolutionary history (Thomasson, 1978; Romaschenko, 2011; Rudall *et al.*, 2014).  
524 The deep-time diversification of grass subfamilies mainly drives the basic pattern of phytolith  
525 shape variation. The ancestors of recent grass species probably carried phytoliths of similar  
526 shapes to those we see in extant species occurring in modern ecosystems (Thomasson, 1987;  
527 Strömberg, 2005; Prasad *et al.*, 2005, 2011).

528 We found differences between subfamilies known for their distinct phytolith shape  
529 (Chloridoideae, Oryzoideae, Bambusoideae, Panicoideae, Pooideae; Twiss *et al.*, 1969;  
530 Gallaher *et al.*, 2020) but also between smaller subfamilies like Aristidoideae, Arundinoideae  
531 and Danthonioideae. We also revealed diversification in phytolith shape in some tribes.  
532 Axially-oriented bilobate-shaped phytoliths of *Ehrharta erecta* (Ehrharteae) differed from  
533 those in Oryzoideae, while *Oryza sativa*, *Zizania latifolia*, and *Leersia oryzoides* (Oryzeae)  
534 formed a separate cluster within this subfamily. Similarly, bilobate-shaped phytoliths of  
535 *Eragrostis minor* and *Enneapogon scoparius* (Eragrostideae) differed from those in  
536 Chloridoideae. Also, *Stipa* and *Piptatherum* (Stipeae) and *Melica* and *Glyceria* (Meliceae)  
537 differed from Pooideae. From this, it is clear that further analysis of phytolith shape  
538 employing a more comprehensive range of grass tribes would be useful.

### 539 *The intraindividual variation in relation to the phylogenetic pattern in phytolith shape*

540 The amount of intraindividual variation was variable across species. However, the  
541 phylogenetic signal in intraindividual variation was generally low. Nevertheless, we detected  
542 high intraindividual variation in some early-diverging lineages (as was previously shown by  
543 Piperno & Pearsall, 1998). The phytolith shapes of *Eragrostis minor* were the most variable –  
544 it carried saddle-shaped phytoliths characteristic of its subfamily Chloridoideae and bilobate-  
545 shaped phytoliths generally attributed to Panicoideae. Similarly, polylobate-shaped phytoliths  
546 occurred in *Ehrharta*, the lineage diverging early from Oryzoideae, itself characterised by tall,  
547 transversally-oriented, bilobate-shaped phytoliths. In Pooideae, the early-diverging lineages  
548 (Brachyelytrum, Brachypodieae, Bromaeae, and Meliceae) also significantly varied in

549 phytolith shape. However, we also found some highly variable phytolith shape in 'crown'  
550 groups (e. g. Poeae, Andropogoneae) and very conservative phytolith shape in early-diverging  
551 lineages (e. g. Aristideae). Further studies of phylogenetic signals in intraindividual phytolith  
552 shape variation are needed to clarify these patterns observed in phytolith shape.

553 Whether there is a phylogenetic signal in intraindividual phytolith shape variation or not, we  
554 still need to consider this variation while classifying fossil phytoliths. In other words, we must  
555 consider whether to classify fossil taxa on the basis of comparison with averaged phytolith  
556 shape (representing whole intraindividual shape variation by a single shape) or compare them  
557 with whole intraindividual phytolith shape variation within the species of our reference  
558 collection. According to the findings of this study, the second option seems to be the better  
559 approach since the averaged phytolith shape of some species does not reflect the natural  
560 variation in phytolith shape (as seen in the extreme case of *Eragrostis minor*). A reference  
561 collection based on the whole intraindividual phytolith shape variation of the studied species  
562 is necessary.

### 563 *The ecological component in phytolith shape variation*

564 Although we found a clear phylogenetic signal in phytolith shape, we consider the high  
565 contrast in terms of the phytolith shape (namely the distinction between elongated and shorter  
566 shapes) of some closely related taxa as striking. As shown before, grass long cell phytoliths,  
567 like crenate and polylobate GSSC phytoliths in some species, are consistently bigger and  
568 proportionally longer in reduced light conditions (Dunn *et al.*, 2015). It was suggested that the  
569 addition of trichomes and stomata to the epidermis might shorten phytoliths, and that the  
570 densities of both stomata and trichomes increase with enhanced light conditions in grasses  
571 (Allard *et al.*, 1991; Knapp & Gilliam, 1985). Focusing on the Pooideae subfamily, we found  
572 such a contrast between the Stipeae and Meliceae tribes. Stipeae comprises species that  
573 generally occupy drier open grasslands and steppe communities (e. g. Romaschenko *et al.*,  
574 2011, 2012). Meliceae is mostly found in shady woodlands or wet environments. More  
575 studies focusing on phytolith shape variation along environmental gradients and on  
576 comparison with other anatomical traits (e. g. stomata and trichome densities) would be  
577 needed in these groups; however, on the basis of what we have learned from this dataset, we  
578 expect this shape variation to be more an outcome of the long-term ecological adaptation of  
579 species than a short-term plastic response of phytolith shape to the environment. Further  
580 testing is crucial in this direction.

581 *Limitations of the current study*

582 Geometric morphometrics enables the quantitative assessment of phytolith shape variation  
583 and the exploration of trends in phytolith shape variation within one morphospace. However,  
584 the Procrustes superimposition of phytolith shapes may not be universally applicable to all  
585 known morphotypes occurring in real samples. As shown in this study, in phytoliths with  
586 symmetric 2D shapes, there may be two or more fixed points delimiting individual symmetric  
587 curves. These points are typically derived from the orientation of phytoliths within plant  
588 tissue. This applies to wide range of phytolith morphotypes; however, phytoliths that do not  
589 bear any such corresponding points, such as those classified into rondel or spheroid groups,  
590 would be unsuitable for a clear-cut morphometric analysis by the generalized Procrustes  
591 analysis. This is the major limitation of our approach, because it prevents us from including  
592 all grass species that carry only such morphotypes, such as the genera *Nardus*, which  
593 represents an early-diverging lineage of Pooideae, or *Festuca* (in particular, species with  
594 narrow leaves).

595 Landmark-based geometric morphometrics applied to a 3D phytolith surface model to  
596 quantify the overall GSSC phytolith shape partially overcomes this problem (Gallaher *et al.*,  
597 2020). 3D shape assessment helps to establish the positional homology of all GSSC phytolith  
598 morphotypes, allowing them to be analysed within a common framework. However, the 3D  
599 morphometrics of phytoliths is based on confocal microscopy (Evet & Cuthrell, 2016), which  
600 makes it more expensive and time-consuming than analysis based on light microscopy. The  
601 fact that 2D geometric morphometrics is more accessible allows robust studies based on large  
602 datasets. This particularly applies to the use of geometric morphometrics in paleoecology,  
603 where high numbers of phytoliths are typically used for the reconstruction of vegetation  
604 dynamics (Piperno, 2006; Strömberg, 2009).

605 *Conclusions*

606 In this study, we demonstrated that the 2D shape of GSSC phytoliths is highly relevant for the  
607 reconstruction of the evolution and paleoecology of Poaceae. Although we showed that  
608 phytolith shape is mainly driven by the deep-time diversification of grass subfamilies, a closer  
609 look also uncovered distinct phytolith shape variation in early-diverging lineages of the  
610 subfamily Pooideae. Geometric morphometrics proved to be particularly helpful in this  
611 regard. It enables the quantitative assessment of the entire phytolith shape and visualises its  
612 variation. Moreover, the geometric morphometrics of 2D phytolith shape is cheap and

613 relatively non-laborious, making it an excellent tool for achieving goals requiring large sums  
614 of phytolith outlines, such as in palaeoecological reconstruction.

## 615 **Acknowledgements**

616 We thank Tomáš Herben at the Charles University in Prague for his help in every stage of  
617 conducting this study, including the study planning, analyses and fruitful comments on the  
618 drafts of the paper. We also thank the Herbarium Collections of the Charles University in  
619 Prague for providing the grass specimens; we thank Pavel Zdvořák, in particular, who kindly  
620 searched for us every grass species we wished for. We thank Matthew Nicholls for his  
621 diligent proofreading of the final manuscript.

## 622 **Author contributions**

623 KH conceived the study, conducted imaging and data analysis. KH and AP collected plant  
624 material in the field. JN developed the scripts for automated analysis of phytolith shape with  
625 biradial symmetry and Procrustes ANOVA. KH wrote the text with contribution of JN, PP,  
626 and AP. All authors approved the final version of the manuscript.

## 627 **References**

- 628 **Adams DC, Collyer ML, Kaliontzopoulou A, Balken, E. 2021.** *Geomorph: Software for ge*  
629 *ometric morphometric analyses*. R package version 3.3.2.  
630
- 631 **Allard G, Nelson CJ, Pallardy SG. 1991.** Shade effects on growth of tall fescue: I. Leaf anat  
632 omy and dry matter partitioning. *Crop Science* **31**: 163–167.  
633
- 634 **Alexandre A, Meunier JD, Lézine AM, Vincens A, Schwartz D. 1997.** Phytoliths:  
635 indicators of grassland dynamics during the late Holocene in intertropical Africa.  
636 *Palaeogeography, Palaeoclimatology, Palaeoecology* **136**: 213–229.  
637
- 638 **Barboni D, Bremond L, Bonnefille R. 2007.** Comparative study of modern phytolith assemb  
639 lages from inter-tropical Africa. *Palaeogeography, Palaeoclimatology, Palaeoecology* **246**: 4  
640 54–470.  
641
- 642 **Bookstein FL. 1997.** Landmark methods for forms without landmarks: morphometrics  
643 of group differences in outline shape. *Medical Image Analysis* **1**: 225–243.  
644
- 645 **Bookstein FL. 1989.** Principal warps: Thin-plate splines and the decomposition of deformatio  
646 ns. *IEEE Transactions in Pattern Analysis and Machine Intelligence* **11**: 567–585.  
647
- 648 **Bouchenak-Khelladi Y, Verboom GA, Savolainen V, Hodkinson TR. 2010.** Biogeography  
649 of the grasses (Poaceae): a phylogenetic approach to reveal evolutionary history in geographic  
650 al space and geological time. *Botanical Journal of the Linnean Society* **162**: 543–557.  
651

- 652 **Bremond L, Alexandre A, Hély C, Guiot J. 2005.** A phytolith index as a proxy of tree cover  
653 density in tropical areas: calibration with Leaf Area Index along a forest–savanna transect in s  
654 outheastern Cameroon. *Global and Planetary Change* **45**: 277-293.  
655
- 656 **Cai Z, Ge S. 2017.** Machine learning algorithms improve the power of phytolith analysis: A c  
657 ase study of the tribe Oryzeae (Poaceae). *Journal of Systematics and Evolution* **55**: 377-384.  
658
- 659 **Collyer ML, Adams DC. 2018.** RRPP: An R package for fitting linear models to high-dimen  
660 sional data using residual randomization. *Methods in Ecology and Evolution* **9**: 1772-1779.  
661
- 662 **Dryden IL, Mardia KV. 2016.** *Statistical Shape Analysis, with applications in R* (Second  
663 Edition). Wiley, Chichester. Chapter 7.
- 664 **Dryden IL. 2019.** shapes: *Statistical Shape Analysis*. R package version 1.2.5.  
665
- 666 **Diester-Haass L, Schrader HJ, Thiede J. 1973.** Sedimentological and paleoclimatological i  
667 nvestigations of two pelagic ooze cores off Cape Barbas, North-West Africa. *Meteor Forshun*  
668 *gergebnisse* **16**: 19-66.  
669
- 670 **Dunn RE, Le TY, Strömberg CA. 2015.** Light environment and epidermal cell morphology  
671 in grasses. *International Journal of Plant Sciences* **176**: 832–847.
- 672
- 673 **Edwards EJ, Smith SA. 2010.** Phylogenetic analyses reveal the shady history of C4 grasses.  
674 *Proceedings of the National Academy of Sciences* **107**: 2532-2537.  
675
- 676 **Gallego L, Distel RA. 2004.** Phytolith assemblages in grasses native to central Argentina. *An*  
677 *nals of Botany* **94**: 865-874.  
678
- 679 **Gallaher TJ, Akbar SZ, Klahs PC, Marvet CR., Senske AM, Clark LG, Strömberg**  
680 **CAE. 2020.** 3D shape analysis of grass silica short cell phytoliths: a new method for fossil  
681 classification and analysis of shape evolution. *New Phytologist* **228**(1): 376-392.
- 682 **Gibson DJ. 2009.** *Grasses and grassland ecology*. Oxford, UK: Oxford University Press.
- 683 **Gunz P, Mitteroecker P. 2013.** Semilandmarks: a method for quantifying curves and  
684 surfaces. *Hystrix, the Italian Journal of Mammalogy* **24**: 103–109.
- 685 **Evett RR, Cuthrell RQ. 2016.** A conceptual framework for a computer-assisted,  
686 morphometric-based phytolith analysis and classification system. *Journal of Archaeological*  
687 *Science* **68**: 70–78.
- 688 **Fahmy AG. 2008.** Diversity of lobate phytoliths in grass leaves from the Sahel region, West  
689 Tropical Africa: Tribe Paniceae. *Plant Systematics and Evolution* **270**: 1-23.  
690
- 691 **Fredlund GG, Tieszen LT. 1994.** Modern phytolith assemblages from the  
692 North American great plains. *Journal of Biogeography* **21**: 321–335.  
693
- 694 **Hošková K, Pokorná A, Neustupa J, Pokorný P. 2021.** Inter- and intraspecific variation in g  
695 rass phytolith shape and size: a geometric morphometrics perspective. *Annals of Botany* **127**:  
696 191-201.

- 697  
698 **International Committee for Phytolith Taxonomy (ICPT) 2019.** International code for phy  
699 tolith nomenclature (ICPN) 2.0. *Annals of Botany* **124**: 189–199.  
700
- 701 **Jacobs BF, Kingston JD, Jacobs LL. 1999.** The origin of grass-dominated ecosystems.  
702 *Annals of the Missouri Botanical Garden* **86**: 590–643.
- 703 **Jin Y, Qian H. 2019.** V. PhyloMaker: an R package that can generate very large phylogenies  
704 for vascular plants. *Ecography* **42**: 1353-1359.  
705
- 706 **Klingenberg CP, Barluenga M, Meyer A. 2002.** Shape analysis of symmetric structures: qu  
707 antifying variation among individuals and asymmetry. *Evolution* **56**: 1909-1920.  
708
- 709 **Klingenberg CP. 2011.** MorphoJ: an integrated software package for geometric morphometri  
710 cs. *Molecular Ecology Resources* **11**: 353-357.
- 711 **Klingenberg CP. 2013.** Visualization in geometric morphometrics: How to read and how to  
712 make graphs showing shape changes. *Hystrix, the Italian Journal of Mammalogy* **24**: 15–24.  
713
- 714 **Klingenberg CP. 2015.** Analyzing fluctuating asymmetry with geometric morphometrics:  
715 concepts, methods, and applications. *Symmetry* **7**: 843–934.  
716
- 717 **Knapp AK, Gilliam FS. 1985.** Response of *Andropogon gerardii* (Poaceae) to fire-induced h  
718 igh vs. low irradiance environments in tallgrass prairie: leaf structure and photosynthetic pigm  
719 ents. *American Journal of Botany* **72**:1668–1671.  
720
- 721 **Kumar S, Milstein Y, Bami Y, Elbaum M, Elbaum R. 2017.** Mechanism of silica depositi  
722 on in sorghum silica cells. *New Phytologist* **213**: 791–798.  
723
- 724 **Lu H, Liu KB. 2003.** Morphological variations of lobate phytoliths from grasses in China an  
725 d the south-eastern United States. *Diversity and Distributions* **9**: 73-87.
- 726 **Mander L, Li M, Mio W, Fowlkes CC, Punyasena SW. 2013.** Classification of grass pollen  
727 through the quantitative analysis of surface ornamentation and texture. *Proceedings of the*  
728 *Royal Society of London. Series B: Biological Sciences* **280**: 1–7.
- 729 **Metcalf CR. 1960.** *Anatomy of the monocotyledons. I. Gramineae.* Oxford: Clarendon  
730 Press.
- 731 **Mulholland SC. 1989.** Phytolith shape frequencies in North Dakota grasses: a comparison to  
732 general patterns. *Journal of Archaeological Science* **16**: 489-511.  
733
- 734 **Mulholland SC, Rapp G Jr. 1992.** A morphological classification of grass silica bodies. In:  
735 Rapp Jr G, Mulholland SC, eds. *Phytolith systematics: emerging issues. advances in*  
736 *archaeological and museum science, vol. 1.* Boston, MA, USA: Springer, 65–89.
- 737
- 738 **Neumann K, Fahmy AG, Müller-Scheeßel N, Schmidt M. 2017.** Taxonomic, ecological an  
739 d palaeoecological significance of leaf phytoliths in West African grasses. *Quaternary Interna*  
740 *tional* **434**: 15-32.  
741



- 742 **Neustupa J. 2013.** Patterns of symmetric and asymmetric morphological variation in unicellu  
743 lar green microalgae of the genus *Micrasterias* (Desmidiiales, Viridiplantae). *Fottea* **13**: 53–63  
744 .
- 745
- 746 **Neustupa, J., Woodard, K. (2021).** Male sterility significantly elevates shape variation and fl  
747 uctuating asymmetry of zygomorphic corolla in gynodioecious *Glechoma hederacea* (Lamiace  
748 ae). *AoB Plants* **13**: plab013.
- 749
- 750 **Novello A, Barboni D, Berti-Equille L, Mazur JC, Poilecot P, Vignaud P. 2012.** Phytolith  
751 signal of aquatic plants and soils in Chad, Central Africa. *Review of Palaeobotany and Palynology* **178**: 43-58.  
752
- 753
- 754 **Oksanen J, Blanchet FG, Friendly M, Kindt R, Legendre R, McGlenn D, Minchin PR, O  
755 'Hara RB, Simpson GL, Solymos P, Stevens MH, Szoecs E, Wagner H 2019.** *vegan: Com  
756 munity Ecology Package*. R package version 2.5-6.
- 757
- 758 **Orme D, Freckleton R, Thomas G, Petzoldt T, Fritz S, Isaac N, Pearse W. 2018.** *caper:*  
759 *Comparative Analyses of Phylogenetics and Evolution in R*. R package version 1.0.1.  
760
- 761 **Pérez R, De Ciurana J, Riba C. 2006.** The characterization and specification of functional re  
762 quirements and geometric tolerances in design. *Journal of Engineering Design* **17**: 311–324.  
763
- 764 **Piperno DR, Pearsall DM. 1998.** The silica bodies of tropical American grasses:  
765 morphology, taxonomy, and implications for grass systematics and fossil phytolith  
766 identification. *Smithsonian Contributions to Botany* **85**: 1–40.
- 767 **Piperno DR. 2006.** *Phytoliths: a comprehensive guide for archaeologists and*  
768 *paleoecologists*. Lanham, MD, USA: Altamira Press.
- 769 **Polly PD, Motz GJ. 2016.** Patterns and processes in morphospace: geometric morphometrics  
770 of three-dimensional objects. *The Paleontological Society Papers* **22**: 71-99.
- 771 **Prasad V, Strömberg CAE, Alimohammadian H, Sahni A. 2005.** Dinosaur coprolites and  
772 the early evolution of grasses and grazers. *Science* **310**: 1177–1180.
- 773 **Prasad V, Strömberg CAE, Leaché AD, Samant B, Patnaik R, Tang L, Mohabey DM,  
774 Ge S, Sahni A. 2011.** Late Cretaceous origin of the rice tribe provides evidence for early  
775 diversification in Poaceae. *Nature Communications* **2**: 1–9.
- 776 **R Core Team. 2020.** *R: A language and environment for statistical computing*. Vienna,  
777 Austria: R Foundation for Statistical Computing.
- 778
- 779 **Revell LJ. 2012.** phytools: An R package for phylogenetic comparative biology (and other thi  
780 ngs). *Methods in Ecology and Evolution* **3**: 217-223.  
781
- 782 **Rohlf FJ. 2015.** The tps series of software. *Hystrix, the Italian Journal of Mammalogy* **26**: 9–  
783 12.  
784
- 785 **Romaschenko K, Peterson P M, Soreng RJ, Futorna, O, Susanna A. 2011.** Phylogenetics  
786 of *Piptatherum* s. l. (Poaceae: Stipeae): Evidence for a new genus, *Piptatheropsis*, and resurre  
787 ction of *Patis*. *Taxon* **60**: 703-1716.

- 788  
789 **Romaschenko K, Peterson PM, Soreng RJ, Garcia-Jacas N, Futorna O, Susanna A. 2012**  
790 **.** Systematics and evolution of the needle grasses (Poaceae: Pooideae: Stipeae) based on analy  
791 sis of multiple chloroplast loci, ITS, and lemma micromorphology. *Taxon* **61**: 18-44.  
792  
793  
794 **Rovner I, Russ JC. 1992.** Darwin and design in phytolith systematics: morphometric  
795 methods for mitigating redundancy. In: Mulholland SC, Rapp G, eds. *Phytolith systematics: e*  
796 *merging issues. Advances in archaeological and museum science, vol 1*. Boston: Springer, **25**  
797 **3–276**  
798  
799 **RStudio Team. 2019.** RStudio: *Integrated Development for R*. RStudio, Inc., Boston, MA.  
800  
801 **Rudall PJ, Prychid CJ, Gregory T. 2014.** Epidermal patterning and silica phytoliths in grass  
802 es: an evolutionary history. *Botanical Review* **80**: 59–71.  
803  
804 **Savriama Y, Neustupa J, Klingenberg CP. 2010.** Geometric morphometrics of symmetry a  
805 nd allometry in *Micrasterias rotata* (Zygnemophyceae, Viridiplantae). *Nova Hedwigia* **136**: 43  
806 –54.  
807  
808 **Savriama Y, Klingenberg CP. 2011.** Beyond bilateral symmetry: geometric morphometric  
809 methods for any type of symmetry. *BMC Evolutionary Biology* **11**: 280.  
810  
811 **Savriama Y, Gómez JM, Perfectti F, Klingenberg CP. 2012.** Geometric morphometrics of  
812 corolla shape: dissecting components of symmetric and asymmetric variation in *Erysimum me*  
813 *diohispanicum* (Brassicaceae). *New Phytologist* **196**: 945-954.  
814  
815 **Savriama Y. 2018.** A step-by-step guide for geometric morphometrics of floral  
816 symmetry. *Frontiers in Plant Science* **9**: 1433.  
817  
818 **Schaefer K, Lauc T, Mitteroecker P, Gunz P, Bookstein FL. 2006.** Dental arch asymmetry  
819 in an isolated Adriatic community. *American Journal of Physical Anthropology: The Official*  
820 *Publication of the American Association of Physical Anthropologists* **129**: 132-142.  
821  
822 **Schubert M, Grønbold L, Sandve SR, Hvidsten TR., Fjellheim S. 2019a.** Evolution of col  
823 d acclimation and its role in niche transition in the temperate grass subfamily Pooideae. *Plant*  
824 *Physiology* **180**: 404-419.  
825  
826 **Schubert M, Marcussen T, Meseguer AS, Fjellheim S. 2019b.** The grass subfamily Pooide  
827 ae: Cretaceous–Palaeocene origin and climate-driven Cenozoic diversification. *Global Ecolog*  
828 *y and Biogeography* **28**: 1168-1182.  
829  
830 **Silantyeva M, Solomonova M, Speranskaja N, Blinnikov MS. 2018.** Phytoliths of temperat  
831 e forest-steppe: A case study from the Altay, Russia. *Review of Palaeobotany and Palynology*  
832 **250**: 1-15.  
833  
834 **Smith SA, Brown JW. 2018.** Constructing a broadly inclusive seed plant phylogeny. *Americ*  
835 *an Journal of Botany* **105**: 302-314.  
836  
837



- 838 **Soreng RJ, Peterson PM, Romaschenko K, Davidse G, Zuloaga FO, Judziewicz EJ, Mor**  
839 **rone, O. 2015.** A worldwide phylogenetic classification of the Poaceae (Gramineae). *Journal*  
840 *of Systematics and Evolution* **53**: 117-137.  
841
- 842 **Soreng RJ, Peterson PM, Romaschenko K, Davidse G, Teisher JK, Clark LG, Zuloaga F**  
843 **O. 2017.** A worldwide phylogenetic classification of the Poaceae (Gramineae) II: An update a  
844 nd a comparison of two 2015 classifications. *Journal of Systematics and Evolution* **55**: 259–2  
845 90.  
846
- 847 **Strömberg CAE. 2005.** Decoupled taxonomic radiation and ecological expansion of open-  
848 habitat grasses in the Cenozoic of North America. *Proceedings of the National Academy of*  
849 *Sciences, USA* **102**: 11980–11984.
- 850 **Strömberg CAE. 2009.** Methodological concerns for analysis of phytolith assemblages: does  
851 count size matter? *Quaternary International* **193**(1-2): 124-140.
- 852 **Strömberg CAE. 2011.** Evolution of grasses and grassland ecosystems. *Annual Review of*  
853 *Earth and Planetary Sciences* **39**: 517-544.
- 854 **Strömberg CAE, Dunn RE, Madden RH, Kohn MJ, Carlini AA. 2013.** Decoupling the  
855 spread of grasslands from the evolution of grazer-type herbivores in South America. *Nature*  
856 *Communications* **4**: 1–8.
- 857 **Strömberg CAE, Dunn RE, Crifò C, Harris EB. 2018.** Phytoliths in paleoecology:  
858 analytical considerations, current use, and future directions. In: Croft DA, Su DF, Simpson  
859 SW eds. *Methods in paleoecology: reconstructing cenozoic terrestrial environments and*  
860 *ecological communities*. Cham, Switzerland: Springer, 235–287.
- 861 **Thomasson JR. 1978.** Epidermal patterns of the lemma in some fossil and living grasses and  
862 their phylogenetic significance. *Science* **199**: 975-977.
- 863 **Thomasson JR. 1987.** Late Miocene plants from northeastern Nebraska. *Journal of*  
864 *Paleontology* **61**: 1065–1079.
- 865 **Twiss PC, Suess E, Smith RM. 1969.** Morphological classification of grass phytoliths. *Soil*  
866 *Science Society of America Proceedings* **33**: 109–115.
- 867 **Twiss PC. 1992.** Predicted world distribution of C3 and C4 grass phytoliths. In: Rapp Jr G,  
868 Mulholland SC, eds. *Phytolith systematics: emerging issues. Advances in archaeological and*  
869 *museum science, vol 1*. Boston, MA, USA: Springer, 113–128.
- 870 **Zelditch ML, Swiderski DL, Sheets DH. 2012.** *Geometric morphometrics for biologists: a*  
871 *primer*, 2nd edn. London: Academic Press.  
872  
873  
874  
875  
876

877 **Supplemental files**

878 Table S1 List of grass species used for analysis of grass silica short cell phytoliths within *in*  
879 *situ* charred epidermis.

880 Table S2 Tests of significant difference in phytoliths shape between the subfamilies.

881 Fig. S1 Pattern in the amount of intraindividual phytolith shape variation across grass  
882 phylogeny.

883 Methods S1 Workflow sequence of landmark-based geometric morphometrics performed on  
884 phytoliths with biradial symmetry.

885

886 Methods S2 Workflow sequence of landmark-based geometric morphometrics and other  
887 methods used in the current study.

888 Notes S1 Zip file of the 'lollipop' graphs visualising the amount of intraindividual variation in  
889 phytolith shape for all grass species under study.

890
